# Supplementary material for: Time-controlled and muscle-specific CRISPR/Cas9-mediated deletion of CTG-repeat expansion in the DMPK gene
Source: PubMed Central journal article supplement — Mol Ther Nucleic Acids. 2021 Nov 29;27:184–99. doi: 10.1016/j.omtn.2021.11.024 (PMC8693309; doi:10.1016/j.omtn.2021.11.024), 2021-11-29
Supplement: mmc1.pdf [file mmc1.pdf]

**Supplemental information**

**Time-controlled and muscle-specific**

**CRISPR/Cas9-mediated deletion**

**of CTG-repeat expansion in the *DMPK* gene**

**Beatrice Cardinali, Claudia Provenzano, Mariapaola Izzo, Christine Voellenkle, Jonathan Battistini, Georgios Strimpakos, Elisabetta Golini, Silvia Mandillo, Ferdinando Scavizzi, Marcello Raspa, Alessandra Perfetti, Denisa Baci, Dejan Lazarevic, Jose Manuel Garcia-Manteiga, Geneviève Gourdon, Fabio Martelli, and Germana Falcone**

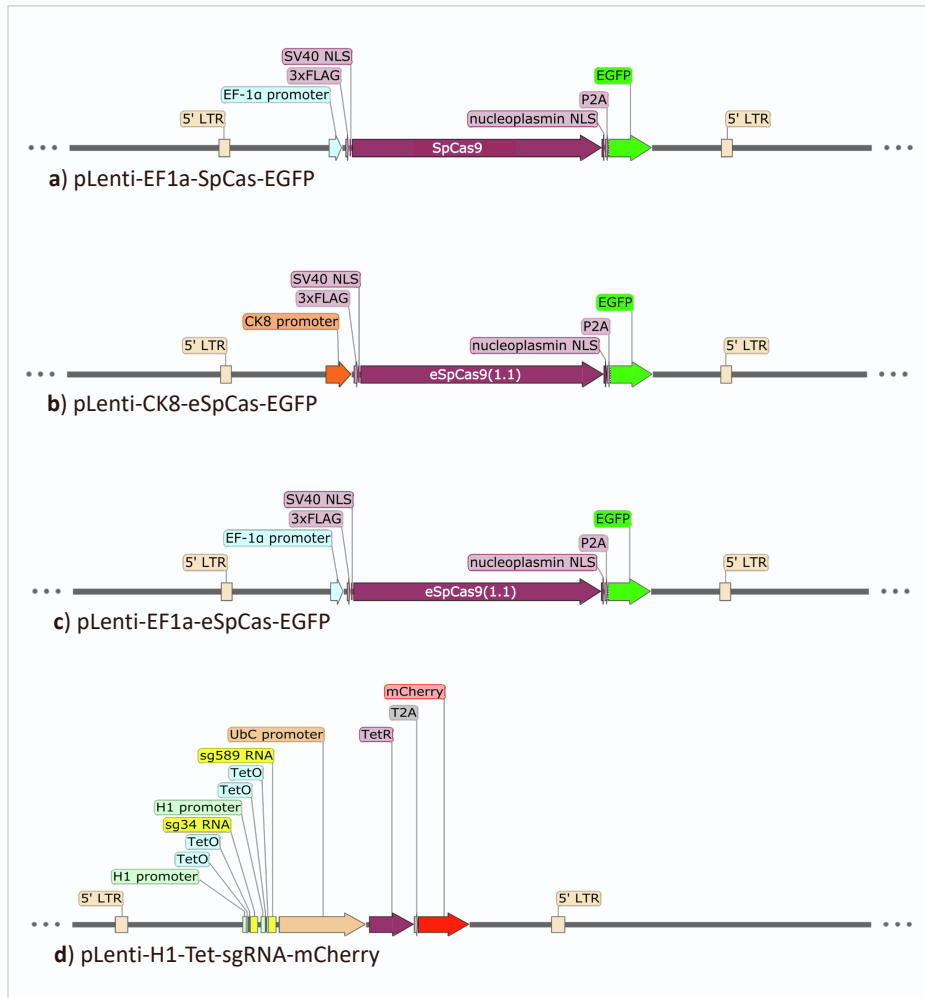

**Figure. S1. Schematic representation of lentiviral constructs.** LTR, long terminal repeats; EF-1a, elongation factor 1a; SpCas9, Cas9 from *Streptococcus pyogenes* (*Sp*); eSpCas9(1.1), enhanced specificity Cas9 (1.1) from *Sp*; EGFP, enhanced green fluorescent protein; CK8, creatine kinase 8; TetO, tetracyclin operator; TetR, tetracyclin repressor; UbC, ubiquitin C.

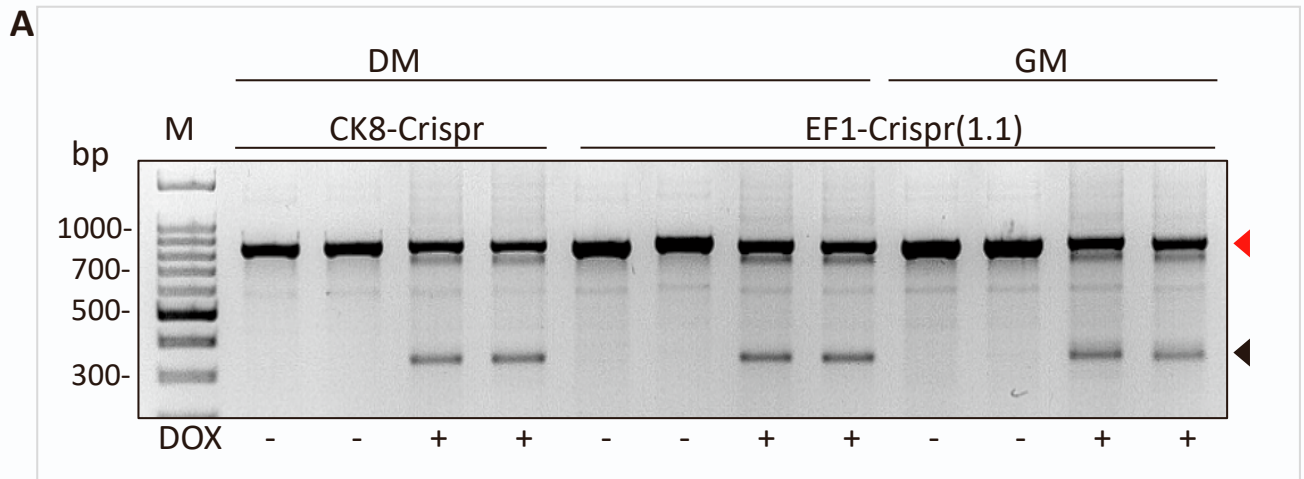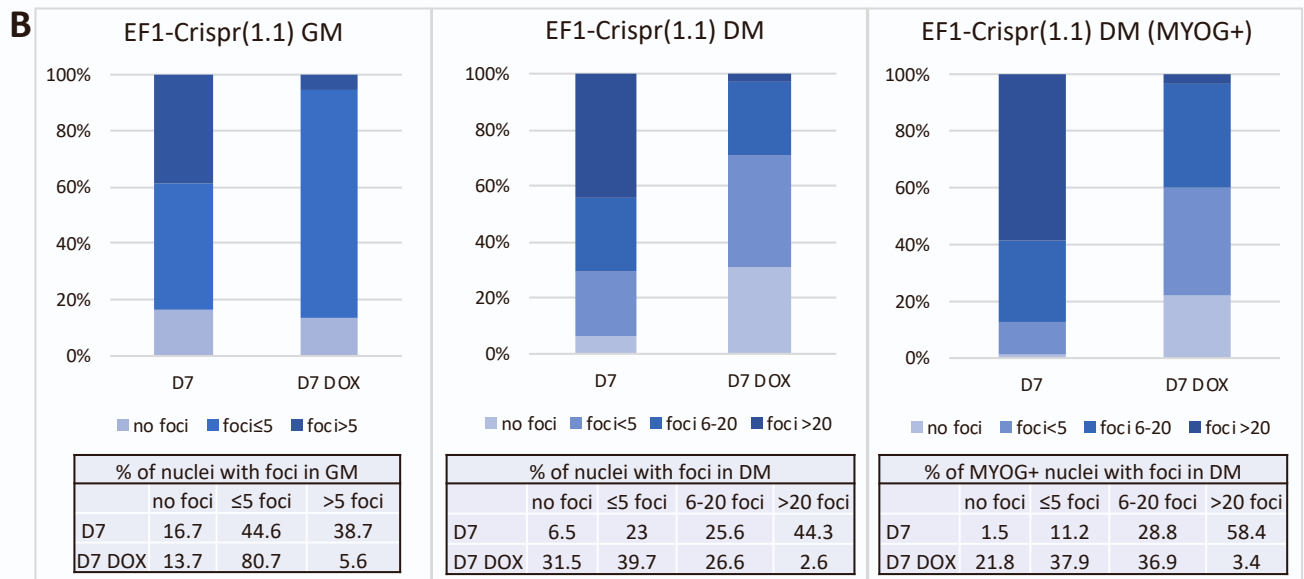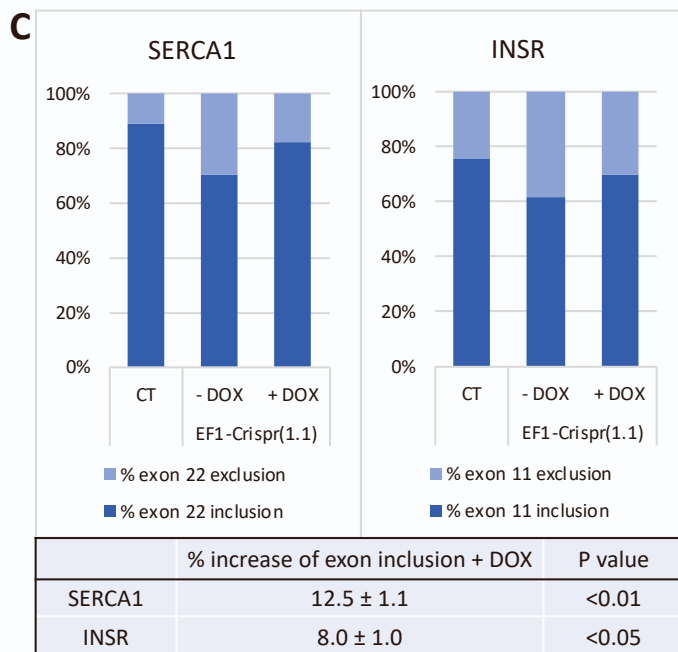

**Figure S2. DOX-inducible *DMPK* gene editing, foci reduction and splicing improvement in DM1 cells infected with EF1-Crispr(1.1).** (A) CK8-Crispr- and EF1-Crispr(1.1)-transduced cells were treated ± DOX for 7 days in growing (GM) and differentiation (DM) medium. Genomic DNA was analysed as described in Figure 2. (B) EF1-Crispr(1.1)-infected cells were treated as described in Figure 3. A representative experiment is shown; at least 300 nuclei were counted for each condition. (C) Quantitative RT-PCR of SERCA1 and INSR in EF1-Crispr(1.1) cells treated as described in Figure 4, using primers specific for each isoform, normalised to the total amount of SERCA1 and INSR transcripts, respectively. The histogram represents the percentage of exon inclusion and exclusion for SERCA1 and INSR transcripts ± DOX, compared to the control cells (CT). For each transcript the percentage of increase of exon inclusion + DOX is shown in the table (mean ± S.E., n=3).

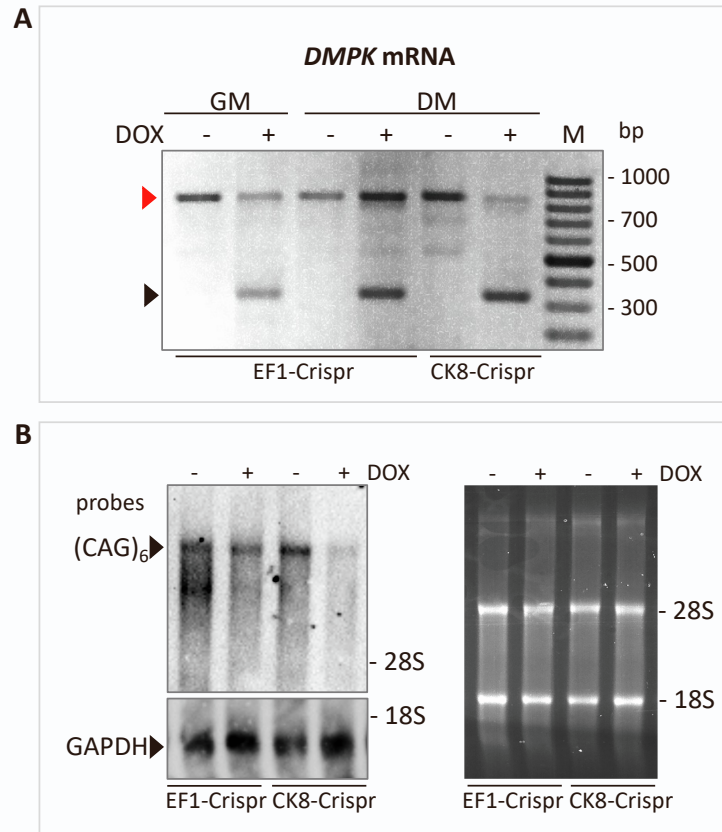

**Figure S3. Expression of *DMPK* in DM1-derived proliferating myoblasts and differentiated myotubes following DOX treatment.** (A) RT-PCR analysis of *DMPK* mRNA from EF1-Crispr and CK8-Crispr myogenic cells, cultured in growing medium (GM) or induced to differentiate in differentiation medium (DM) for 2 days and then treated with DOX in GM/DM for 7 days. The black triangle indicates the expected CTG-deleted product, amplified using primers binding upstream (*DMPK* upF) and downstream (*DMPK* dwR) of CTG expansion; the red triangle indicates undeleted wt transcript. (B) Polyadenylated RNA from EF1-Crispr and CK8-Crispr cells grown in GM  $\pm$  DOX and shifted in DM for 1 day was analysed by Northern blot and hybridised with the probes indicated on the left. The *DMPK* mutated transcript is shown in the top panel and the *GAPDH* transcript in the bottom panel. In-gel RNA staining of polyadenylated and residual 18S and 28 ribosomal RNAs is shown on the right panel as a proof of RNA integrity.

**A**

| EF1-Crispr_GM    | No DeDup        |                  | DeDup           |                  |
|------------------|-----------------|------------------|-----------------|------------------|
|                  | # reads (x1000) | % modified reads | # reads (x1000) | % modified reads |
| double cut       | 99.2            | 93.7             | 8.3             | 93.9             |
| single cut sg34  | 108.1           | 56.5             | 37.6            | 56.2             |
| single cut sg589 | 168.6           | 13.5             | 55.3            | 13.7             |

**B**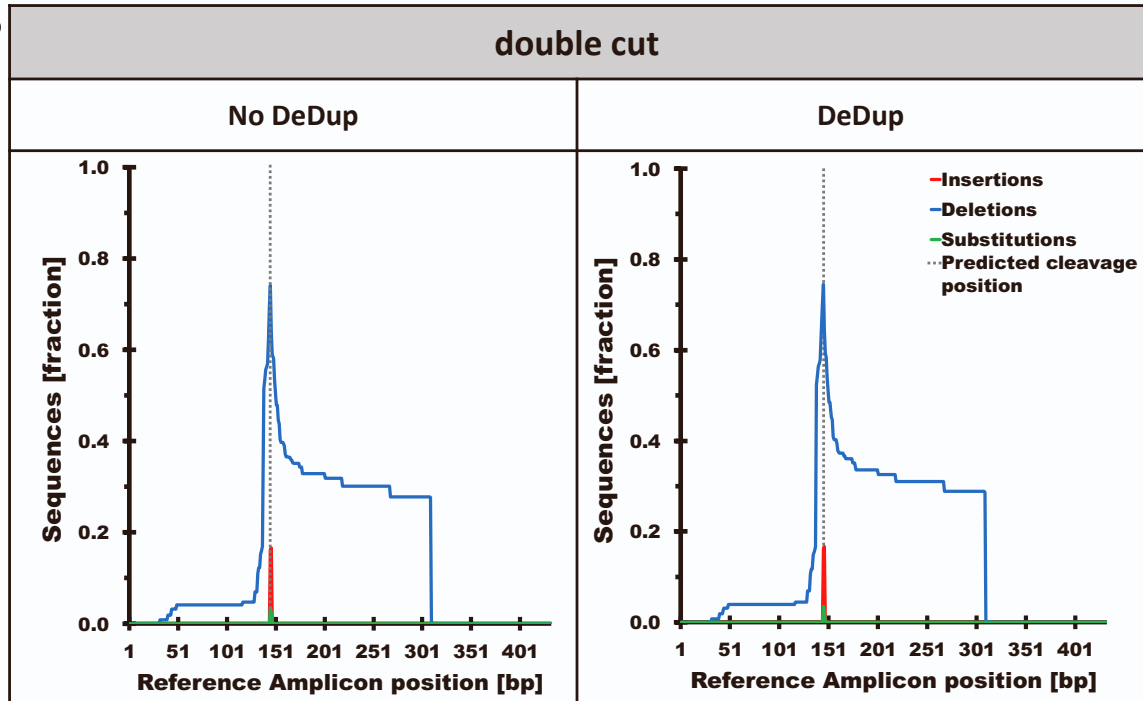

**Figure S4. Similar results of on-target analysis before and after deduplication.** UMIs were added to each DNA fragment before amplicon production and subsequently exploited in the down-stream analysis to identify and remove read duplicates produced during PCR. Fractions of insertions, deletions and substitutions identified in EF1-Crisp-treated cells in GM are shown before (NoDeDup) and after deduplication (DeDup). (A) Number of reads aligning to the investigated region are shown together with percentage of modified reads before and after deduplication for each possible editing activity. (B) Representative amplicon sequencing analysis before and after deduplication performed for on-target double cut event. Representative single cut on-target analyses before and after deduplication are shown in figure S5.

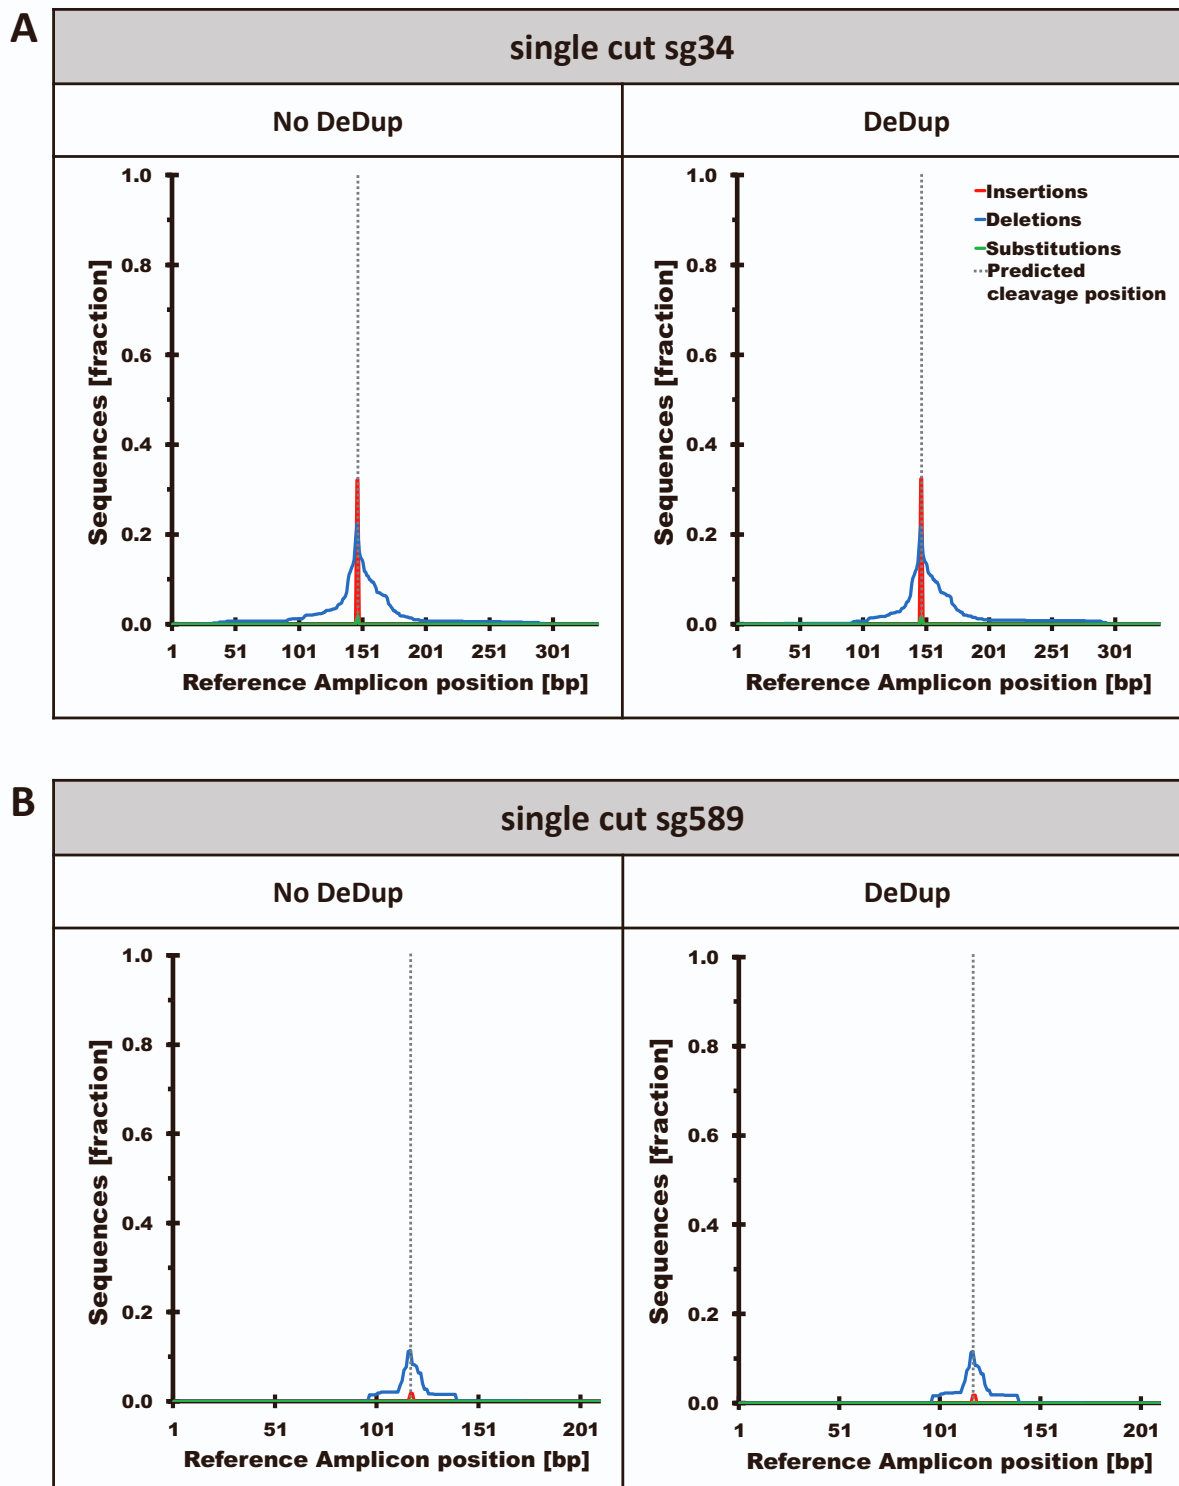

**Figure S5. Single cut on-target analysis before and after deduplication.** UMIs were added to each DNA fragment before amplicon production and subsequently exploited in the down-stream analysis to identify and remove read duplicates produced during PCR. Fractions of insertions, deletions and substitutions identified in EF1-Crisp-treated cells in GM are shown before (NoDeDup) and after deduplication (DeDup). Comparison was performed for single cuts of either (A) sg34 (single cut sg34) or (B) sg589 (single cut sg589). Representative samples are shown.

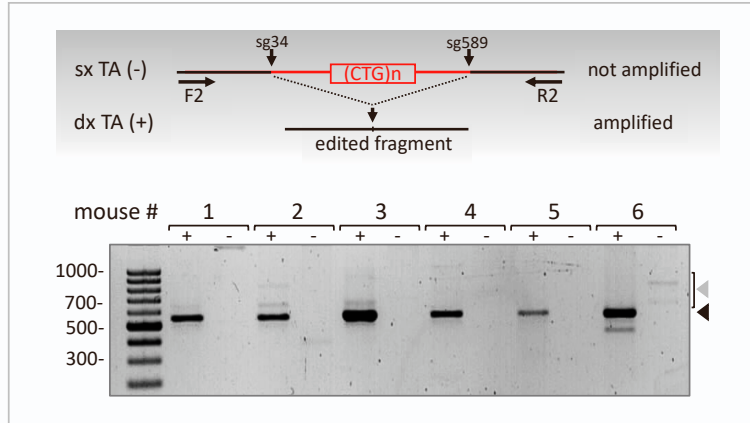

**Figure S6. DOX-inducible DMPK gene editing in tibialis anterior muscles of DMSXL homozygous mice.** Editing of genomic DNA extracted from TA muscles of DMSXL homozygous mice, injected with the AAV vectors (dx TA, +) or with saline solution (sx TA, -) and fed with DOX diet for two weeks. Primers DMPK F2 (F2) and DMPK R2 (R2) were used for PCR amplification. In the diagram the expected outcomes in AAV-injected or contralateral TA muscles are indicated. The black triangle indicates the expected CTG-deleted products, the gray triangle indicates non-specific PCR products.

**Table S1. Sg34 and sg589 potential off-targets identified by at least 2 prediction algorithms, ranked decreasingly by number of intersections (Excel file)**

**Table S2. Investigation of sequence variations in potential sg34 and sg589 off-targets (Excel file)**

**Table S3. Primers used for amplicon production for on- and off-target analysis by amplicon deep sequencing (Excel file)**



**Table S4. Primers used for PCR analysis of genomic DNA and RNA**

| <b>PCR Primers</b>   |                            |                  |                         |
|----------------------|----------------------------|------------------|-------------------------|
| DMPK upF             | TGTTCCGCCGTTGTTCTGTCTC     | DMPK dwR         | CAGAGCTTTGGGCAGATGGAG   |
| DMPK F2              | GTCCCAGGAGCCAATCAGAGG      | DMPK R2          | CTAGCTCCTCCCAGACCTTCG   |
| hINSR ex11 F         | CCAAAGACAGACTCTCAGAT       | hINSR ex11 R     | AACATCGCCAAGGGACCTGC    |
| hSERCA1 ex22 F       | ATCTTCAAGCTCCGGGCCCT       | hSERCA1 ex22     | CAGCTCTGCCTGAAGATGTG    |
| <b>qPCR Primers</b>  |                            |                  |                         |
| Cas9 F               | CGGCACAGCATCAAGAAGAA       | Cas9 R           | TCTTCTGGCGGTTCTCTTCA    |
| DMPK up R            | GCATTCGCCGCTACAAGGAC       | DMPK dw1 R       | CAGTGCATCCAAAACGTG      |
| DMPK ref F           | CTGGGTGTATTCGCCTATG        | DMPK ref R       | CGTGCTCACCTTGTAGTG      |
| GAPDH univ F         | CACCATCTCCAGGAGCGAG        | GAPDH univ F     | CCTTCTCCATGGTGGTGAAGAC  |
| hrpL23 F             | TCCGGATTCCTTGGGTCTT        | hrpL23 R         | TGTTCAGCCGTCCTTGATC     |
| INSR com F           | ATCGACTGGTCCCCTATCCT       | INSR com R       | AGATGGTCGGGCAAACCTTCT   |
| INSR excl 11 F       | TTTTCGTCCCCAGGCCATC        | INSR excl 11 R   | ACCAGCGACTCCTTGTTCAC    |
| INSR incl 11 F       | CGAATGCTGCTCCTGTCCAA       | INSR incl 11 R   | GCCTGAAGAGGTTTTTCTGGG   |
| SERCA com F          | GGTGATCCGCCAGCTAATGA       | SERCA com R      | GGGCACCCTTGACAAACATC    |
| SERCA excl 22 F      | GGAACCTACCTAGAGGATCCAGAAGA | SERCA excl 22 R  | AGCTCTGCCTGAAGATGTGTC   |
| SERCA incl 22 F      | CAGTGGCTCATGGTCCTCAA       | SERCA incl 22 R  | GGGGAACAGTTATCCCTCTAGGT |
| sg34RNA F            | GGCACTCAGTCTTCCAACG        | sgRNAcom R       | CGACTCGGTGCCACTTTT      |
| sg589RNA F           | ATATCCAAACCGCCGAAG         | sgRNAcom R       | CGACTCGGTGCCACTTTT      |
| <b>ddPCR Primers</b> |                            |                  |                         |
| ddPCR.Ref.DMPK F     | CTGGGTGTATTCGCCTATG        | ddPCR.Ref.DMPK R | CGTGCTCACCTTGTAGTG      |
| dd589F               | CTTCTTGTGCATGACGCC         | dd589R           | CTGTAGCCTGTGACGAGTC     |
| ddDeIF               | GCGCTCCCTGAACCCTAGAA       | ddDeIR           | TCCAAAACGTGGATTGGGGT    |
